# Supplementary material for: Desire and reality – teaching and assessing communicative competencies in undergraduate medical education in German-speaking Europe – a survey
Source: PubMed Central journal article supplement (PMC4647163; doi:10.3205/zma000998), 2015-11-16
Supplement: ZMA-32-56-s-002.pdf [file ZMA-32-56-s-002.pdf]

**Attachment 2:** Data on the years of study in which communicative competencies are instructed in the curricula and whether a longitudinal communication curriculum has been implemented in full, in part or not at all (academic year = AJ)

*\*Due to the modular design of the curriculum, allocation to academic years not entirely possible.*

| No.              | Longitudinal communication curriculum implemented | 1st AY    | 2nd AY    | 3rd AY    | 4th AY    | 5th AY    | 6th AY    | AY total |
|------------------|---------------------------------------------------|-----------|-----------|-----------|-----------|-----------|-----------|----------|
| 1                | Yes                                               | Yes       | Yes       | Yes       | Yes       | Yes       | Yes       | 6        |
| 2                | Yes                                               | Yes       | Yes       | Yes       | Yes       | Yes       | Yes       | 6        |
| 3                | Yes                                               | Yes       | Yes       | Yes       | Yes       | Yes       | No        | 5        |
| 4                | Yes                                               | Yes       | Yes       | Yes       | Yes       | Yes       | No        | 5        |
| 5                | Yes*                                              | Yes       | Yes       | No        | Yes       | Yes       | Yes       | 5        |
| 6                | Yes                                               | Yes       | Yes       | Yes       | Yes       | No        | No        | 4        |
| 7                | Yes                                               | No        | Yes       | Yes       | Yes       | Yes       | No        | 4        |
| 8                | Yes                                               | Yes       | No        | Yes       | No        | No        | Yes       | 3        |
| 9                | Yes                                               | No        | No        | Yes       | Yes       | Yes       | No        | 3        |
| 10               | Yes                                               | Yes       | Yes       | No        | No        | No        | No        | 2        |
| <b>Sum 1-10:</b> | <b>10</b>                                         | <b>8</b>  | <b>8</b>  | <b>8</b>  | <b>8</b>  | <b>7</b>  | <b>4</b>  |          |
| 11               | In part                                           | Yes       | Yes       | Yes       | Yes       | Yes       | Yes       | 6        |
| 12               | In part                                           | Yes       | Yes       | Yes       | Yes       | Yes       | Yes       | 6        |
| 13               | In part                                           | Yes       | Yes       | Yes       | Yes       | Yes       | Yes       | 6        |
| 14               | In part                                           | Yes       | Yes       | Yes       | Yes       | Yes       | Yes       | 6        |
| 15               | In part                                           | Yes       | Yes       | Yes       | Yes       | Yes       | Yes       | 6        |
| 16               | In part                                           | Yes       | Yes       | Yes       | Yes       | Yes       | Yes       | 6        |
| 17               | In part                                           | Yes       | Yes       | Yes       | Yes       | Yes       | Yes       | 6        |
| 18               | In part                                           | Yes       | Yes       | Yes       | Yes       | Yes       | No        | 5        |
| 19               | In part                                           | Yes       | Yes       | Yes       | Yes       | Yes       | No        | 5        |
| 20               | In part                                           | Yes       | Yes       | Yes       | Yes       | Yes       | No        | 5        |
| 21               | In part                                           | Yes       | Yes       | Yes       | Yes       | Yes       | No        | 5        |
| 22               | In part                                           | Yes       | Yes       | Yes       | Yes       | Yes       | No        | 5        |
| 23               | In part                                           | Yes       | Yes       | Yes       | Yes       | No        | No        | 4        |
| 24               | In part                                           | Yes       | Yes       | Yes       | No        | Yes       | No        | 4        |
| 25               | In part                                           | No        | Yes       | Yes       | No        | Yes       | Yes       | 4        |
| 26               | In part*                                          | Yes       | Yes       | Yes       | Yes       | No        | No        | 4        |
| 27               | In part                                           | No        | Yes       | Yes       | Yes       | Yes       | No        | 4        |
| 28               | In part                                           | No        | Yes       | Yes       | Yes       | No        | Yes       | 4        |
| 29               | In part                                           | No        | Yes       | Yes       | Yes       | Yes       | No        | 4        |
| 30               | In part                                           | Yes       | No        | Yes       | Yes       | No        | No        | 3        |
| 31               | In part                                           | Yes       | Yes       | Yes       | No        | No        | No        | 3        |
| 32               | In part                                           | Yes       | No        | No        | Yes       | No        | Yes       | 3        |
| 33               | In part                                           | Yes       | Yes       | No        | No        | No        | No        | 2        |
| 34               | In part                                           | No        | Yes       | Yes       | No        | No        | No        | 2        |
| 35               | In part*                                          | No        | No        | No        | No        | No        | No        | 0        |
| <b>Sum 11-35</b> | <b>25</b>                                         | <b>19</b> | <b>22</b> | <b>22</b> | <b>19</b> | <b>16</b> | <b>10</b> |          |
| 36               | No                                                | No        | Yes       | Yes       | Yes       | Yes       | Yes       | 5        |
| 37               | No                                                | Yes       | No        | Yes       | Yes       | Yes       | No        | 4        |
| 38               | No                                                | No        | Yes       | Yes       | Yes       | Yes       | No        | 4        |
| 39               | No                                                | Yes       | No        | Yes       | Yes       | No        | No        | 3        |
| 40               | No                                                | No        | Yes       | No        | No        | No        | No        | 1        |
| <b>Sum 36-40</b> | <b>5</b>                                          | <b>2</b>  | <b>3</b>  | <b>4</b>  | <b>4</b>  | <b>3</b>  | <b>1</b>  |          |
| <b>Sum 1-40</b>  | <b>40</b>                                         | <b>39</b> | <b>33</b> | <b>34</b> | <b>31</b> | <b>26</b> | <b>15</b> |          |
